# Supplementary material
Source: publisher figshare collection journal article supplement (https://gsajournals.figshare.com/ndownloader/files/28102740)
Supplement: Supplementary file 1 [file 28102740]

## Sheet: Table S5
Table S5. List of top BLASTP hits in rice and Arabidopsis for the eight maize candidate genes identified via a genome-wide association study of 15 fresh kernel elemental phenotypes in sweet corn.
Phenotype	Maize gene ID	Query length (amino acids)	Gene annotation	Species	Rice/Arabidopsis homolog gene ID	Rice/Arabidopsis homolog gene descriptiona	Ortholog to maize gene (www.maizegdb.org; www.gramene.org)	Syntenic ortholog to maize geneb	Rice/Arabidopsis homolog sequence ID	Subject length (amino acids)	Identities	Positives	Gaps	BLASTP bit score	BLASTP E-value
Boron	Zm00001d031473	446	Aminoacylase-1	Rice	Os08t0511900/LOC_Os08g40110.1	Similar to aminoacylase-1	Yes	Yes	Os08t0511900-01	328	277/315 (87%)	289/315 (91%)	0/315 (0%)	578	3e-165
					Os06t0210200/LOC_Os06g10770.1	Peptidase M20 domain containing protein	No	No	Os06t0210200-01	447	239/407 (58%)	304/407 (74%)	2/407 (0%)	504	4e-143
					Os02t0690800/LOC_Os02g46520.1	Peptidase M20 family protein.	No	No	Os02t0690800-02	444	63/270 (23%)	113/270 (41%)	40/270 (14%)	58.5	7e-09
				Arabidopsis	AT4G38220	AQI, AQUAPORIN INTERACTOR; Peptidase M20/M25/M40 family protein	Yes	-	AT4G38220.1	430	282/415 (68%)	330/415 (80%)	7/415 (2%)	539	0
					AT1G44180	Peptidase M20/M25/M40 family protein	No	-	AT1G44180.3	435	241/405 (60%)	307/405 (76%)	5/405 (1%)	483	3e-169
					AT1G44820	Peptidase M20/M25/M40 family protein	No	-	AT1G44820.1	438	232/405 (57%)	305/405 (75%)	5/405 (1%)	466	9e-163
Boron	Zm00001d031476	90	Heavy metal-associated domain containing protein	Rice	Os08t0512200/LOC_Os08g40130.1	PI55-2; Similar to heavy metal-associated domain containing protein	Yes	Yes	Os08t0512200-00	96	73/90 (81%)	79/90 (87%)	0/90 (0%)	146	3e-36
					Os03t0120400/LOC_Os03g02860.1	Heavy metal transport/detoxification protein domain containing protein	No	No	Os03t0120400-01	194	34/90 (37%)	53/90 (58%)	3/90 (3%)	59.3	5e-10
					Os10t0537400/LOC_Os10g39210.1	Similar to metal ion binding protein	No	No	Os10t0537400-00	186	27/66 (40%)	46/66 (69%)	1/66 (1%)	54.3	2e-08
				Arabidopsis	AT3G56891	Heavy metal associated protein 32 (HMP32); Heavy metal-associated isoprenylated plant protein 45 (HIPP45)	No	-	AT3G56891.2	143	28/62 (45%)	41/62 (66%)	1/62 (2%)	62.8	7e-14
					AT4G10465	Heavy metal associated protein 34 (HMP34); Heavy metal-associated isoprenylated plant protein 44 (HIPP44)	No	-	AT4G10465.1	183	36/90 (40%)	55/90 (61%)	2/90 (2%)	60.1	2e-12
					AT1G06330	Heavy metal associated protein 2 (HMP02)	No	-	AT1G06330.1	150	31/87 (36%)	51/87 (59%)	2/87 (2%)	58.2	5e-12
Cadmium	Zm00001d005190	898	Cadmium/zinc-transporting ATPase HMA2 (heavy metal ATPase3; hma3)	Rice	Os07t0232900/LOC_Os07g12900.1	HMA3	Yes	Yes	Os07t0232900-01	1005	583/815 (71%)	647/815 (79%)	28/815 (3%)	952	0
					Os06t0700700/LOC_Os06g48720.1	HMA2	No	No	Os06t0700700-02	1068	466/727 (64%)	575/727 (79%	12/727 (1%)	934	0
					Os02t0196600/LOC_Os02g10290.1	HMA4	No	No	Os02t0196600-01	979	229/765 (29%)	366/765 (47%)	105/765 (13%)	277	3e-74
				Arabidopsis	AT4G30110	HMA2	Yes	-	AT4G30110.2	961	364/680 (54%)	489/680 (72%)	6/680 (1%)	576	0
					AT2G19110	HMA4	Yes	-	AT2G19110.3	1172	343/651 (53%)	471/651 (72%)	11/651 (2%)	559	0
					AT4G30120	HMA3	Yes	-	AT4G30120.1	542	279/534 (52%)	378/534 (71%)	8/534 (1%)	417	3e-136
Cadmium	Zm00001d005189	964	Cadmium/zinc-transporting ATPase HMA2 (heavy metal ATPase4; hma4)	Rice	Os07t0232900/LOC_Os07g12900.1	HMA3	Yes	Yes	Os07t0232900-01	1005	558/842 (66%)	633/842 (75%)	71/842 (8%)	914	0
					Os06t0700700/LOC_Os06g48720.1	HMA2	No	No	Os06t0700700-02	1068	467/770 (60%)	581/770 (75%)	55/770 (7%)	908	0
					Os02t0196600/LOC_Os02g10290.1	HMA4	No	No	Os02t0196600-01	979	216/780 (27%)	358/780 (45%)	126/780 (16%)	237	3e-62
				Arabidopsis	AT4G30110	HMA2	Yes	-	AT4G30110.2	951	353/683 (52%)	470/683 (69%)	40/683 (6%)	615	0
					AT2G19110	HMA4	Yes	-	AT2G19110.3	1172	346/681 (51%)	480/681 (70%)	41/681 (6%)	599	0
					AT4G30120	HMA3	Yes	-	AT4G30120.1	542	278/568 (49%)	372/568 (65%)	38/568 (7%)	443	3e-145
Calcium	Zm00001d025654	150	ATFP4	Rice	Os04t0464100/LOC_Os04g39010.1	Heavy metal transport/detoxification protein domain containing protein	No	No	Os04t0464100-01	119	43/82 (52%)	63/82 (76%)	0/82 (0%)	85.9	9e-18
					Os04t0469000/LOC_Os04g39350.1	Heavy metal transport/detoxification protein domain containing protein	No	Yes	Os04t0469000-01	123	34/68 (50%)	50/68 (73%)	0/68 (0%)	70.9	3e-13
					Os04t0469300/LOC_Os04g39380.1	Similar to ATFP4	No	No	Os04t0469300-01	133	55/149 (36%)	84/149 (56%)	19/149 (12%)	63.9	3e-11
				Arabidopsis	AT3G07600	Heavy metal transport/detoxification superfamily protein; Heavy metal-associated isoprenylated plant protein 16 (HIPP16)	No	-	AT3G07600.1	157	34/70 (49%)	50/70 (71%)	0/70 (0%)	69.7	1e-15
					AT5G48290	Heavy metal transport/detoxification superfamily protein; Heavy metal-associated isoprenylated plant protein 46 (HIPP46)	No	-	AT5G48290.1	181	33/70 (47%)	50/70 (71%)	0/70 (0%)	65.9	8e-14
					AT4G05030	Copper transport protein family	No	-	AT4G05030.2	77	29/58 (50%)	41/58 (71%)	0/58 (0%)	56.2	3e-11
Nickel	Zm00001d044768	542	Protein NRT1/ PTR FAMILY 5.8	Rice	Os06t0239500/LOC_Os06g13210.1	TGF-beta receptor, type I/II extracellular region family protein	Yes	Yes	Os06t0239500-01	536	375/549 (68%)	433/549 (78%)	29/549 (5%)	668	0
					Os06t0239300/LOC_Os06g13200.1	Oligopeptide transporter domain containing protein	Yes	No	Os06t0239300-00	533	356/539 (66%)	412/539 (76%)	40/539 (7%)	610	5e-175
					Os01t0871600/LOC_Os01g65110.1	Similar to Peptide transporter PTR2-B	No	No	Os01t0871600-01	545	214/538 (39%)	304/538 (56%)	64/538 (11%)	353	1e-97
				Arabidopsis	AT5G14940	Major facilitator superfamily protein (Protein NRT1/ PTR FAMILY 5.8)	Yes	-	AT5G14940.1	552	262/553 (47%)	348/553 (63%)	46/553 (8%)	429	3e-145
					AT3G01350	Major facilitator superfamily protein (Protein NRT1/ PTR FAMILY 5.9)	Yes	-	AT3G01350.1	563	258/561 (46%)	347/561 (62%)	46/561 (8%)	420	3e-141
					AT1G22540	Major facilitator superfamily protein (NPF5.10)	No	-	AT1G22540.1	557	220/566 (39%)	314/566 (55%)	90/566 (16%)	317	2e-101
Nickel	Zm00001d044771	370	Metalloendoproteinase 5-MMP	Rice	Os06t0239100/LOC_Os06g13180.1	Peptidase M10A and M12B, matrixin and adamalysin family protein	Yes	Yes	Os06t0239100-01	372	237/344 (68%)	271/344 (78%)	11/344 (3%)	459	2e-129
					Os02t0740700/LOC_Os02g50730.1	MMP1	No	No	Os02t0740700-01	373	222/334 (66%)	261/334 (78%)	7/334 (2%)	437	3e-123
					Os10t0557900/LOC_Os10g40830.1	Peptidase M10A and M12B, matrixin and adamalysin family protein	No	No	Os10t0557900-00	356	138/291 (47%)	175/291 (60%)	13/291 (4%)	253	1e-67
				Arabidopsis	AT1G70170	AT2-MMP	Yes	-	AT1G70170.1	378	161/310 (52%)	197/310 (64%)	12/310 (4%)	296	7e-98
					AT1G24140	AT3-MMP	Yes	-	AT1G24140.1	384	163/324 (50%)	207/324 (64%)	17/324 (5%)	285	1e-93
					AT1G59970	AT5-MMP	Yes	-	AT1G59970.1	360	139/286 (49%)	178/286 (62%)	16/286 (6%)	254	1e-81
Zinc and Iron	Zm00001d022557	363	Nicotianamine synthase (nicotianamine synthase5; nas5)	Rice	Os07g0689600/LOC_Os07g48980.1	NAS3	Yes	Maize gene not listed	Os07t0689600-01	344	252/320 (78%)	276/320 (86%)	4/320 (1%)	483	5e-137
					Os03g0307200/LOC_Os03g19420.2	NAS2	No	Maize gene not listed	Os03t0307200-01	327	222/328 (67%)	254/328 (77%)	8/328 (2%)	407	4e-114
					Os03t0307300/LOC_Os03g19427.1	NAS1	No	Maize gene not listed	Os03t0307300-01	333	220/328 (67%)	251/328 (76%)	5/328 (1%)	406	9e-114
				Arabidopsis	AT1G56430	NAS4	Yes	-	AT1G56430.1	324	143/272 (53%)	191/272 (70%)	4/272 (1%)	259	2e-84
					AT1G09240	NAS3	Yes	-	AT1G09240.1	320	146/313 (47%)	202/313 (65%)	12/313 (4%)	251	2e-81
					AT5G56080	NAS2	Yes	-	AT5G56080.1	320	134/270 (50%)	182/270 (67%)	6/270 (2%)	241	3e-77
aRice gene description is from https://rapdb.dna.affrc.go.jp, and Arabidopsis gene description is from https://www.arabidopsis.org
bhttps://doi.org/10.6084/m9.figshare.7926674.v1
